# Supplementary material
Source: PubMed Central journal article supplement (PMC7371267)
Supplement: NIHMS1607937-supplement-Supplementary_figures.pdf [file NIHMS1607937-supplement-Supplementary_figures.pdf]

## Supplementary Figures

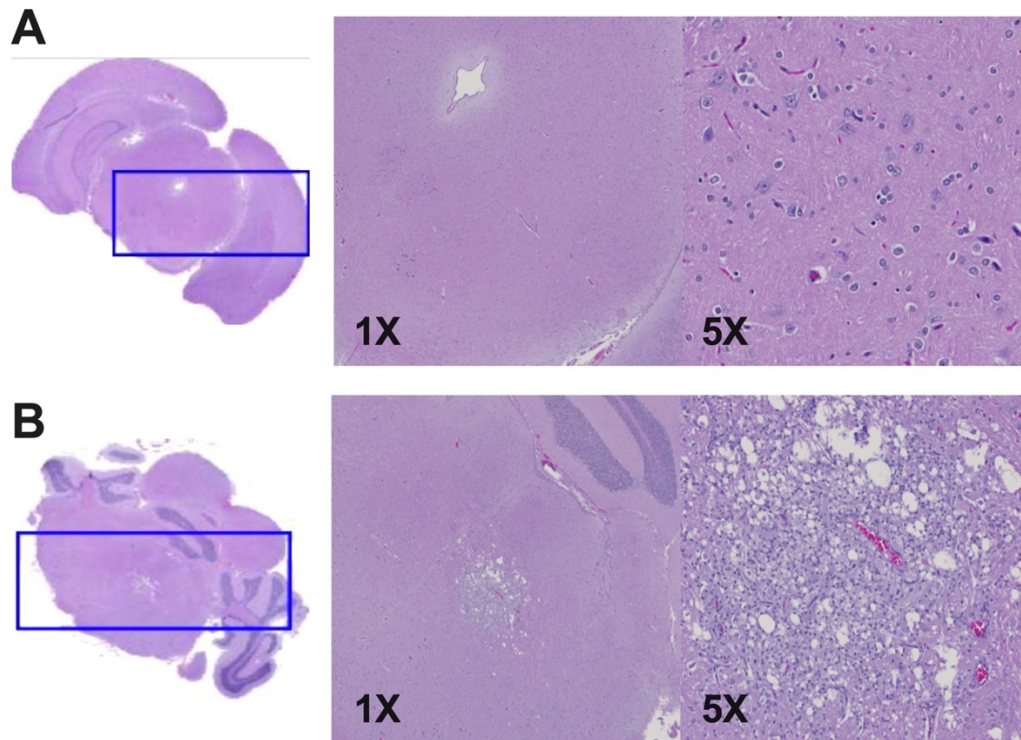

**Supplementary Figure 1.** Representative hematoxylin and eosin-stained coronal 20 µm sections of rat brainstem immediately following infusions of sterile isotonic saline via CED **A)** after a single 90 µL injection over 1.5 hours with the absence of gross or microscopic histological changes, and **B)** after five daily 90 µL injections over 1.5 hours each depicting small cavitory lesions along the cannula tract.

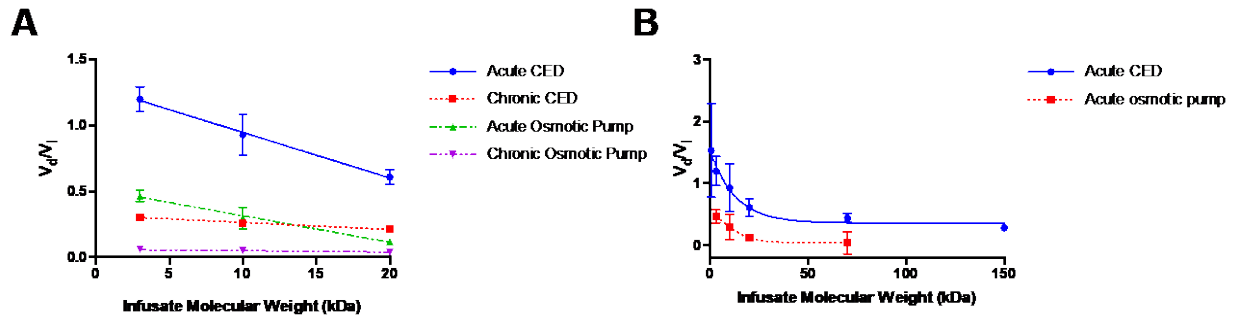

**Supplementary Figure 2.** Inversely proportional relationship between infusate MW and standardized volume of distribution to infusion volume ( $V_d/V_i$ ) in multiple settings. **A)** In the 3-20 kDa range, this relationship was linear ( $R^2$ , 0.99 in all settings). **B)** For acute CED and osmotic pump over a broader range, 570 Da up to 150 kDa, this relationship was better modeled by an exponential model ( $R^2$ , 0.91 and 0.94 respectively). All data points were obtained from n=3 brainstems and presented as mean  $\pm$ SD.

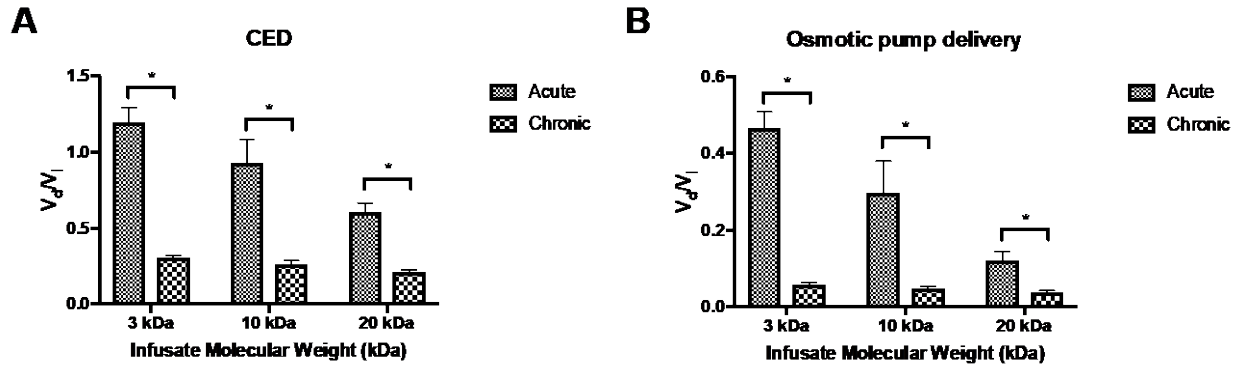

**Supplementary Figure 3.** Comparison of  $V_d/V_i$  after acute versus chronic infusion by **A)** CED and **B)** osmotic pump delivery grouped by infusate MW. All data points represented as mean  $\pm$ SD, and were obtained from n=3 brainstems. Statistical significance determined by means of student's t-test and  $P < 0.05$  marked by (\*).

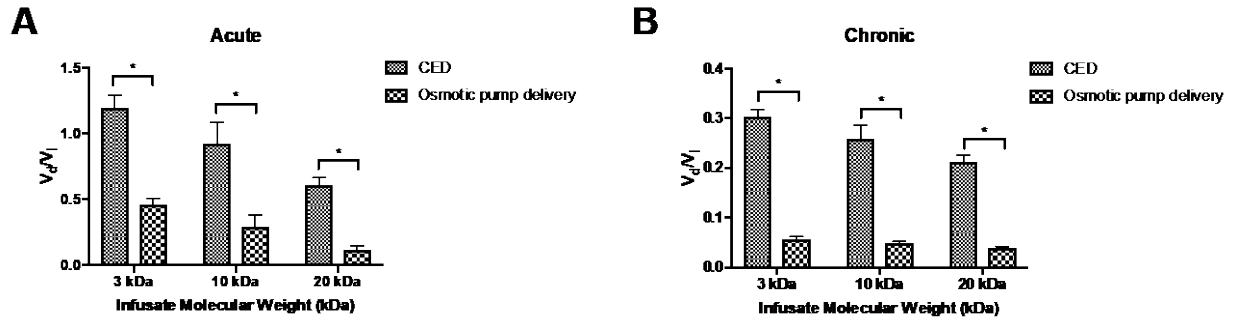

**Supplementary Figure 4.** Comparison of  $V_d/V_i$  after CED versus osmotic pump delivery infusion in either **A)** an acute setting (1.5 hrs CED, 24 hrs osmotic pump delivery) or **B)** a chronic setting (1.5 hrs CED daily for five days, five continuous days for osmotic pump delivery) grouped by infusate MW. All data points represented as mean  $\pm$ SD, and were obtained from n=3 brainstems. Statistical significance determined by means of student's t-test and  $P < 0.05$  marked by (\*).
